# Supplementary material for: Structural study of trivalent lanthanide and actinide complexes formed upon solvent extraction
Source: Royal Society of Chemistry journal article supplement (doi:10.1039/b609492a), 2006-01-01
Supplement: b609492a.doc [file b609492a.doc]

**Structural study of trivalent lanthanide and actinide complexes formed upon solvent extraction**

Benoît Gannaza, Mark R. Antonio*b, Renato Chiariziab, Clément Hilla, and Gérard Cotec

aCEA-Valrhô, DEN/VRH/DRCP/SCPS/LCSE, B.P. 17171, 30207 Bagnols-sur-Cèze Cedex, France

bChemistry Division, Argonne National Laboratory, 9700 South Cass Avenue, Argonne, IL 60439-4831 USA. E-mail: [mantonio@anl.gov](mailto:mantonio@anl.gov); Fax: +(630) 252 4225; Tel: +(630) 252 9267

cEcole Nationale Supérieure de Chimie de Paris, Laboratoire d’Electrochimie et de Chimie Analytique (UMR CNRS no. 7575), 11 rue Pierre et Marie Curie, 75005 Paris, France

Fits of k3χ(k) EXAFS data corresponding to the results of Table 2 for the two-shell (O, P) fits to the single-extractant, 5-series of M3+ complexes with HDHP.

Fits of k3χ(k) EXAFS data corresponding to the results of Table 3 for the one-shell (O) fits to the single-extractant, 8-series of M3+ complexes with DMDOHEMA.

Results of PCA, principal component (factor) analysis, for the Am L3-edge k3χ(k) EXAFS of the single-extractant systems (5Am/HDHP and 8Am/DMDOHEMA) and the binary-extractant HDHP/DMDOHEMA systems (18Am, 19Am, and 20Am as well as 29Am with HDEHP/DMDOHEMA).

Linear combination fits of the M3+ EXAFS for the binary-extractant HDHP/DMDOHEMA systems with the corresponding M3+ EXAFS for the single-extractant HDHP (5M) and DMDOHEMA (8M) systems corresponding to the data of Table 4. The red line is the experimental EXAFS and the blue line is the fit.

18NdNT

18AmNT

19AmNT

19YbNT

20NdNT

20AmNT

20EuNT

20YbNT
